# Supplementary material for: An integrative approach for efficient analysis of whole genome bisulfite sequencing data
Source: PubMed Central journal article supplement (PMC4682396; doi:10.1186/1471-2164-16-s12-s14), 2015-12-09

### Additional file 1: Figure S1 - Mapping results of the three mappers with long (100bp) and short (50bp) reads

The bars show mapping rate and mapping accuracy of the three mappers with reads that contains 2% error (a and c for mapping rate and mapping accuracy, respectively) and 8% error (b and d for mapping rate and mapping accuracy, respectively). The dark purple bars represent results with short (50bp) reads and the light purple bars represent results with long (100bp) reads.

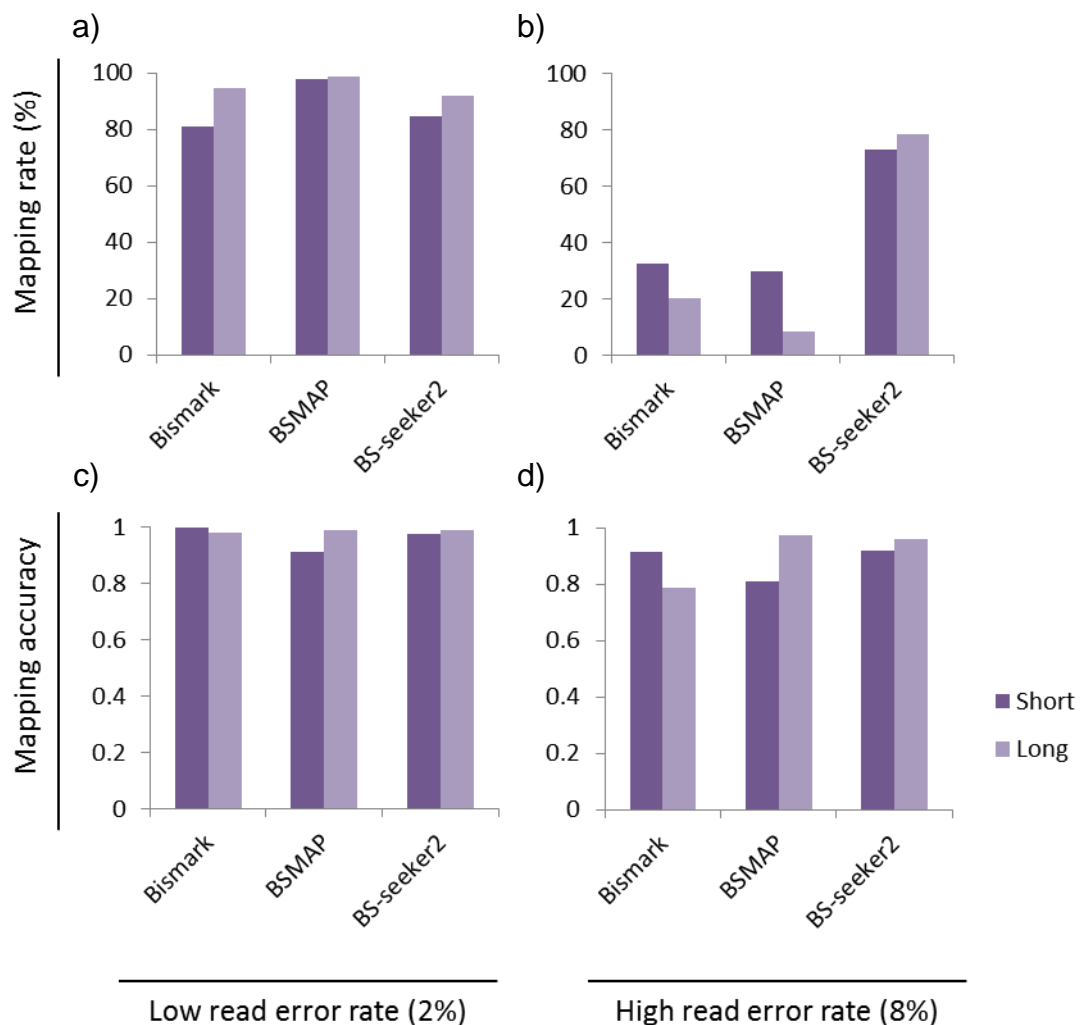

Supplement: 1471-2164-16-S12-S14-S1.pdf [file 1471-2164-16-S12-S14-S1.pdf]
