# Supplementary material for: An integrative approach for efficient analysis of whole genome bisulfite sequencing data
Source: PubMed Central journal article supplement (PMC4682396; doi:10.1186/1471-2164-16-s12-s14), 2015-12-09

## Additional file 2: Figure S2 - Rate of correctly mapped reads by three mappers

The numbers show rate of reads that correctly mapped by each three mapper over total read number, when read error rate equals to 2% (a) and 8% (b). The numbers in middle reveal rate of reads that correctly mapped by all three mappers. Also the numbers followed by each mapper shows rate of reads that correctly mapped only by the mapper.

a)

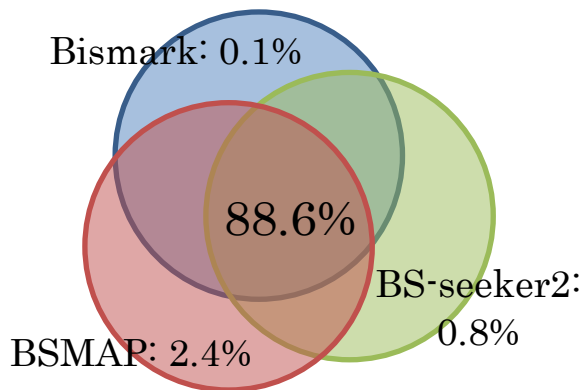

b)

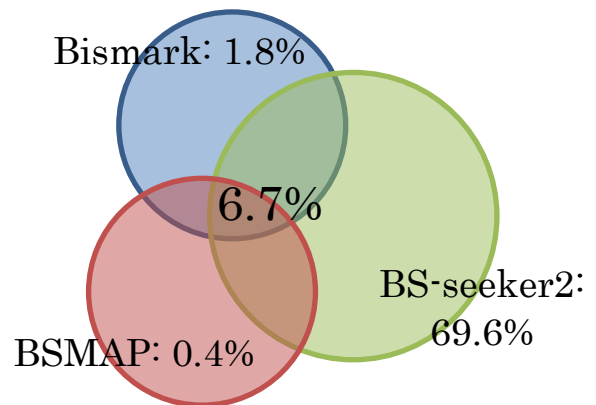

Supplement: 1471-2164-16-S12-S14-S2.pdf [file 1471-2164-16-S12-S14-S2.pdf]
