# Supplementary material for: An integrative approach for efficient analysis of whole genome bisulfite sequencing data
Source: PubMed Central journal article supplement (PMC4682396; doi:10.1186/1471-2164-16-s12-s14), 2015-12-09
Supplement: 1471-2164-16-S12-S14-S3.pdf [file 1471-2164-16-S12-S14-S3.pdf]

**Additional file 3: Table S1-4 one-side Wilcoxon single-rank test between d-accuracy by wAve and d-accuracy by three mappers**

The tables show P-values by one-side Wilcoxon single-rank test between d-accuracy by wAve and d-accuracy by three mappers across 500-long blocks of hg19 chr19. If the P-value is lower than 0.05, it means the d-accuracy by wAve is significantly lower than the d-accuracy by each mapper across blocks. The bold types are values that lower than 0.05. R err means read error rate.

**Table1 P-value for mCpG with 100bps-long reads**

**Table2 P-value for mCpH with 100bps-long reads**

| R err (%) | Bismark | BSMAP    | BSseeker2      | R err (%) | Bismark | BSMAP    | BSseeker2      |
|-----------|---------|----------|----------------|-----------|---------|----------|----------------|
| 0         | 2.9E-21 | 5.3E-09  | <b>3.7E-01</b> | 0         | 7.7E-05 | 2.1E-04  | <b>8.8E-01</b> |
| 2         | 2.3E-14 | 6.4E-03  | 4.0E-140       | 2         | 1.6E-07 | 8.6E-07  | 2.2E-57        |
| 4         | 2.8E-96 | 5.0E-157 | 6.3E-103       | 4         | 5.9E-64 | 1.0E-152 | 1.9E-66        |
| 6         | 0       | 0        | 8.7E-46        | 6         | 0       | 0        | 1.16E-28       |
| 8         | 0       | 0        | 1.5E-62        | 8         | 0       | 0        | 1.12E-85       |

**Table3 P-value for mCpG with 50bps-long reads**

**Table4 P-value for mCpH with 50bps-long reads**

| R err (%) | Bismark        | BSMAP    | BSseeker2 | R err (%) | Bismark        | BSMAP    | BSseeker2 |
|-----------|----------------|----------|-----------|-----------|----------------|----------|-----------|
| 0         | 7.4E-63        | 8.0E-302 | 2.5E-07   | 0         | 1.0E-38        | 8.6E-152 | 2.6E-06   |
| 2         | <b>1.0E+00</b> | 1.4E-184 | 5.9E-129  | 2         | <b>1.6E-01</b> | 3.7E-131 | 9.2E-80   |
| 4         | <b>1.0E+00</b> | 1.3E-193 | 9.0E-296  | 4         | <b>9.6E-01</b> | 3.1E-148 | 4.0E-150  |
| 6         | 1.99E-54       | 0        | 6.12E-152 | 6         | 7.75E-92       | 0        | 4.72E-87  |
| 8         | 0              | 0        | 2.36E-54  | 8         | 0              | 0        | 4.08E-34  |
