# Supplementary material for: An integrative approach for efficient analysis of whole genome bisulfite sequencing data
Source: PubMed Central journal article supplement (PMC4682396; doi:10.1186/1471-2164-16-s12-s14), 2015-12-09

### Additional file 5: Figure S4 – Mapping rate of whole genome bisulfite sequencing data

It shows mapping rates of WGBS samples by the three mappers; ESC=Embryonic stem cell, iPSC=induced pluripotent stem cell, Br=brain, d=day and y=year (cf. Br-5y means 5 years old brain)

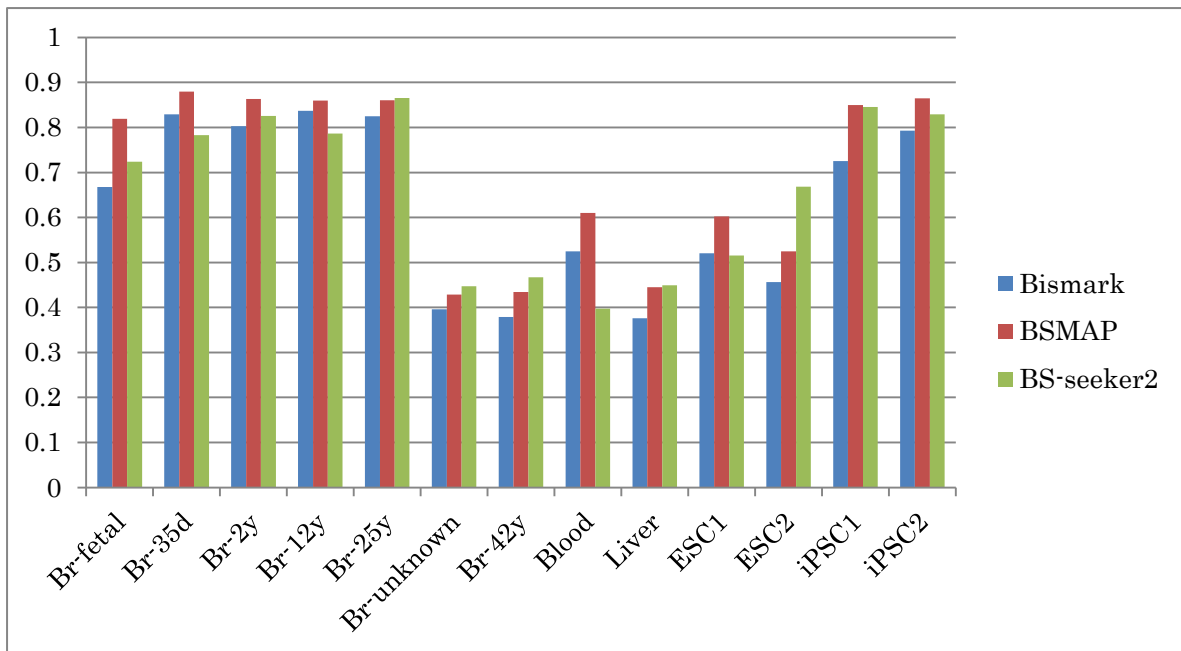

Supplement: 1471-2164-16-S12-S14-S5.pdf [file 1471-2164-16-S12-S14-S5.pdf]
