# Supplementary material for: An integrative approach for efficient analysis of whole genome bisulfite sequencing data
Source: PubMed Central journal article supplement (PMC4682396; doi:10.1186/1471-2164-16-s12-s14), 2015-12-09

## Additional file 6: Figure S5- Hierarchical clustering results base on CpG and CpH methylation levels extracted by BS-seeker2

Hierarchical clustering results base on CpG and CpH methylation levels extracted by BS-seeker2; Distance is  $1 - \text{spearman correlation coefficient}$ . ESC=Embryonic stem cell, iPSC=induced pluripotent stem cell, Br=brain, d=day and y=year (cf. Br-5y means 5 years old brain). Also, the red circle groups the two samples that produced by same experiment.

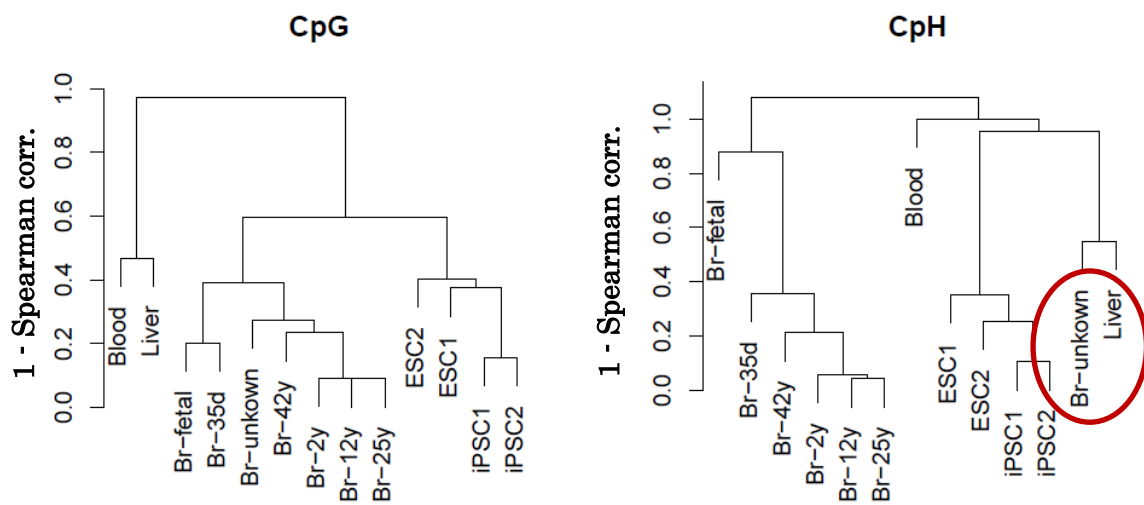

Supplement: 1471-2164-16-S12-S14-S6.pdf [file 1471-2164-16-S12-S14-S6.pdf]
