# Supplementary material for: An integrative approach for efficient analysis of whole genome bisulfite sequencing data
Source: PubMed Central journal article supplement (PMC4682396; doi:10.1186/1471-2164-16-s12-s14), 2015-12-09

### Additional file 7: Figure S6 – Correlation of CpG methylation levels among brain samples that produced from same experiment and different experiments

Spearman correlation of CpG methylation in gene-body regions between brain samples that produced from same experiment (GSE47966, 5 samples) and multiple experiments (GSE47966, GSE46710, GSE46698, 7 samples). Error bars represent maximum and minimum correlation value between samples. The information of gene-body regions was downloaded from refseq database.

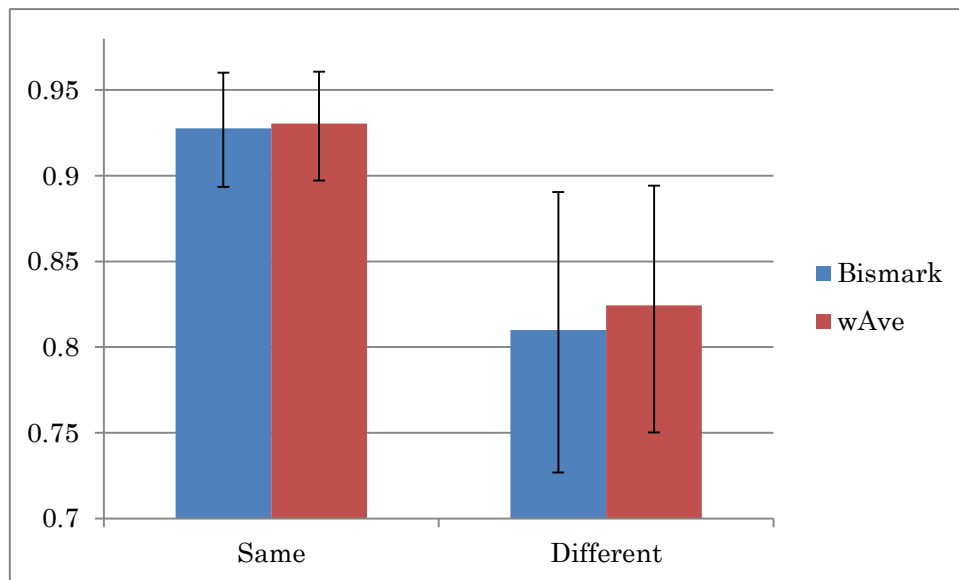

Supplement: 1471-2164-16-S12-S14-S7.pdf [file 1471-2164-16-S12-S14-S7.pdf]
